# Supplementary material for: Arene-perfluoroarene interactions in crystal engineering. Part 3. Single-crystal structures of 1 : 1 complexes of octafluoronaphthalene with fused-ring polyaromatic hydrocarbonsFor part 1, see ref. 1. For part 2, see ref. 2. Presented at the 16th International Symposium on Fluorine Chemistry, University of Durham, UK, 16â€“21 July 2000, Abstract no. 308.Electronic supplementary information (ESI) available: experimental data for the re-determination of the crystal structure of triphenylene, tables of the average bond lengths in OFN and the polyaromatic molecules in both the complexes and pure compounds, and a table of distances and angles for intermolecular HÂ·Â·Â·F contacts in the complexes which are below the sum of the van der Waals radii. See http://www.rsc.org/suppdata/nj/b1/b105502j/
Source: Royal Society of Chemistry journal article supplement (doi:10.1039/b105502j), 2001-10-19
Supplement: b105502j.doc [file b105502j.doc]

###### **Supplementary Information For:**

The submission to *New J. Chem.*

# Arene–perfluoroarene Interactions in Crystal Engineering 3:

# Single-crystal Structures of 1:1 Complexes of Octafluoronaphthalene with Fused-ring Polyaromatic Hydrocarbons

Jonathan C. Collings, Karl P. Roscoe, Rhodri Ll. Thomas, Andrei S. Batsanov*, Lorna M. Stimson, Judith A.K. Howard and Todd B. Marder*

Diffraction quality crystals of triphenylene were obtained by slow evaporation from a solution in CH2Cl2. Data were collected at 150 K on a crystal with dimensions of 0.3 x 0.1 x 0.15 mm3 using a Siemens SMART 3-circle diffractometer, equipped with a 1 K CCD area detector, using graphite-monochromated Mo-K radiation (= 0.71073 Å). The temperature of the crystal was controlled by an Oxford Cryosystems open-flow N2 gas cryostat,1 the temperature was calibrated on the phase transition of K2HPO4 at 122.5 K,2 the possible error not exceeding ±1 K. The structure was solved by direct methods, and refined by full-matrix least squares on F2 of all data, using SHELXTL software.3All C atoms were refined in anisotropic approximation and all H atoms in isotropic approximation. Thermal motion analysis and bond length correction were made using PLATON-99 programs.4

The compound crystallised in the orthorhombic space group *P*212121 with cell parameters of *a* = 5.280, *b* = 12.972(5), *c* = 16.707(7), V = 1144.3(8) and Z = 2. The crystal density  was calculated to be 1.325 g cm-3, and the absorption co-efficient  = 0.075 mm-1. A total of 9200 reflections were collected, of which 1876 were independent (Rint = 0.1327), and 959 had *I* > 2(*I*). A total of 163 parameters were refined. The residuals were *R*1 = 0.0563, *wR*2 = 0.1205, and the residual electron density was 0.193, (-0.231) eÅ-3. The absolute structure parameter was not determinable as the Friedel equivalents merged.

All additional crystallographic data, excluding structure factors, have been deposited with the Cambridge Crystallographic Data Centre as supplementary publication no. CCDC-157251. Copies of the data can be obtained free of charge on application to CCDC, 12 Union Road, Cambridge CB2 1EZ, UK (fax: (+44) 1223 336-033;

e-mail: [deposit@ccdc.cam.ac.uk](mailto:deposit@ccdc.cam.ac.uk)).

## References

1 J. Cosier, A. M. Glazer, *J. Appl. Crystallogr.* 1986, **19**, 105.

2 R. J. Nelmes, G. M. Meyer, J. E. Tiballis, *J. Phys. C: Solid State Phys.*1982, **15**, 59.

3 *SHELXTL,* *An integrated system for solving, refining and displaying crystal structures*

*from diffraction data, Ver. 5.10* (1997). Bruker Analytical X-ray Systems, Madison,

Wisconsin, U.S.A.

4 A. L. Speck, *PLATON-99*, *A multipurpose crystallographic tool.* Univ. of Utrecht, The

Netherlands, 1980-99.

Table S1. Average C–C Bond Lengths of Polyaromatic Molecules in Complexes and Pure Compounds

| Polyaromatic | Equivalent C–C Bonds | Average Bond Length in OFN Complex (Å) | Equivalent Average Bond Length in Pure Compound (Å) |
| --- | --- | --- | --- |
| Anthracene | C6–C7, C6’–C7’ | 1.359(2) | 1.361(1) |
|  | C6–C11, C6’–C11’ | 1.434(2) | 1.434(1) |
|  | C7–C8, C7’–C8’ | 1.423(3) | 1.428(1) |
|  | C10–C11, C10’–C11’ | 1.441(3) | 1.436(1) |
|  | C10–C12, C10’–C12’ | 1.397(3) | 1.401(1) |
|  |  |  |  |
| Phenanthrene | C6–C7, C12–C13,  C6’–C7’, C12’–C13’ | 1.363(8) | 1.349(8) |
|  | C6–C16, C13–C19,  C6’–C16’, C13’–C19’ | 1.432(7) | 1.414(4) |
|  | C7–C8, C11–C12  C7’–C8’, C11’–C12’ | 1.406(8) | 1.382(9) |
|  | C8–C9, C10–C11,  C8’–C9’, C10’–C11’ | 1.376(7) | 1.377(4) |
|  | C9–C17, C10–C18,  C9’–C17’, C10’–C18’ | 1.403(7) | 1.392(7) |
|  | C14–C15, C14’–C15’ | 1.344(7) | 1.338(5) |
|  | C15–C16, C14–C19,  C15’–C16’, C14’–C19’ | 1.421(7) | 1.422(7) |
|  | C16–C17, C18–C19,  C16’–C17’, C18’–C19’ | 1.415(7) | 1.411(7) |
|  | C17–C18, C17’–C18’ | 1.472(7) | 1.454(6) |
|  |  |  |  |
| Pyrene | C6–C7, C6–C11,  C6’–C7’, C6’–C11’ | 1.387(3) | 1.387(3) |
|  | C7–C8, C10–C11,  C7’–C8’, C10’–C11’ | 1.339(3) | 1.402(2) |
|  | C8–C9, C9–C10,  C8’–C9’, C9’–C10’ | 1.431(3) | 1.422(2) |
|  | C8–C12, C10–C13’,  C8’–C12’, C10’–C13 | 1.444(3) | 1.436(2) |
|  | C9–C9’ | 1.426(4) | 1.427(2) |
|  | C12–C13, C12’–C13’ | 1.347(3) | 1.353(2) |
|  |  |  |  |
| Triphenylene | C11–C12, C13–C14, C15–C16, C17–C18,  C19-C20, C21–C22 | 1.374(3) | 1.380(5) |
|  | C11–C23, C14–C24,  C15–C25, C18–C26,  C19-C27, C22–C28 | 1.414(2) | 1.412(4) |
|  | C12–C13, C16–C17,  C20–C21 | 1.390(3) | 1.393(5) |
|  | C23–C24, C25–C26,  C27–C28 | 1.415(2) | 1.412(4) |
|  | C23–C28, C24–C25  C26–C27 | 1.470(2) | 1.471(4) |

Table S2. Average bond lengthsa in pure octafluoronaphthalene and in complexes **1**-**4**.

|  |  | OFN | **1** | -**2** | **3** | **4** |
| --- | --- | --- | --- | --- | --- | --- |
| C‑C | i | 1.435(2)  1.438 | 1.432(3)  1.436 | 1.427(5)  1.435 | 1.431(2)  1.436 | 1.442(4)  1.446 |
|  | ii | 1.418(2)  1.420 | 1.416(2)  1.418 | 1.406(3)  1.412 | 1.415(2)  1.418 | 1.413(3)  1.416 |
|  | iii | 1.365(2)  1.366 | 1.357(2)  1.359 | 1.350(4)  1.357 | 1.359(3)  1.362 | 1.355(3)  1.358 |
|  | iv | 1.407(2)  1.410 | 1.396(2)  1.400 | 1.392(4)  1.400 | 1.395(3)  1.400 | 1.405(3)  1.409 |
| C‑F | v | 1.346(2)  1.349 | 1.353(2)  1.357 | 1.345(3)  1.353 | 1.346(2)  1.351 | 1.352(2)  1.355 |
|  | vi | 1.335(2)  1.337 | 1.346(2)  1.348 | 1.344(3)  1.350 | 1.346(2)  1.350 | 1.344(3)  1.347 |

a Observed (top lines) and corrected for libration (bottom lines) in a rigid-body TLS mode: V. Schomaker and K. N. Trueblood, *Acta Crystallogr., Sect. B,* 1968, **28**, 63.

Table S3. Intermolecular C–H···F Contacts Below the Sum of the van der Waals Radii

| Complex | Contact | H···F a Distance (Å) | C–H···F Angle (o) |
| --- | --- | --- | --- |
| **1** | C6-H6···F1 | 2.40 | 136.5 |
|  | C12-H12···F1 | 2.51 | 135.9 |
|  | C8-H8···F2 | 2.52 | 146.5 |
|  | C7-H7···F4 | 2.59 | 131.5 |
|  | C7-H7···F3 | 2.64 | 155.4 |
| -**2** | C14-H14···F4 | 2.41 | 113.5 |
|  | C8-H8···F2 | 2.46 | 118.2 |
|  | C12-H12···F3 | 2.52 | 116.0 |
|  | C15-H15···F4 | 2.53 | 109.2 |
|  | C9-H9···F4 | 2.56 | 152.1 |
|  | C10-H10···F4 | 2.56 | 151.6 |
|  | C6-H6···F3 | 2.59 | 126.4 |
|  | C11-H11···F3 | 2.61 | 112.4 |
|  | C7-H7···F2 | 2.62 | 112.4 |
| **3** | C12-H12···F1 | 2.53 | 119.3 |
|  | C6-H6···F2 | 2.56 | 120.9 |
|  | C11-H11···F3 | 2.61 | 158.3 |
|  | C6-H6···F4 | 2.65 | 117.6 |
|  | C11-H11···F4 | 2.66 | 117.8 |
| **4** | C13-H13···F4 | 2.50 | 125.2 |
|  | C20-H20···F5 | 2.52 | 121.3 |
|  | C15-H15···F1 | 2.53 | 148.4 |
|  | C18-H18···F8 | 2.57 | 121.7 |
|  | C22-H22···F3 | 2.59 | 139.2 |
|  | C19-H19···F7 | 2.59 | 142.5 |

a All C–H distances normalized to 1.08 Å
